# Supplementary material for: Analyses of histological and transcriptome differences in the skin of short-hair and long-hair rabbits
Source: PubMed Central journal article supplement (PMC6377753; doi:10.1186/s12864-019-5503-x), 2019-02-15

Figure S1

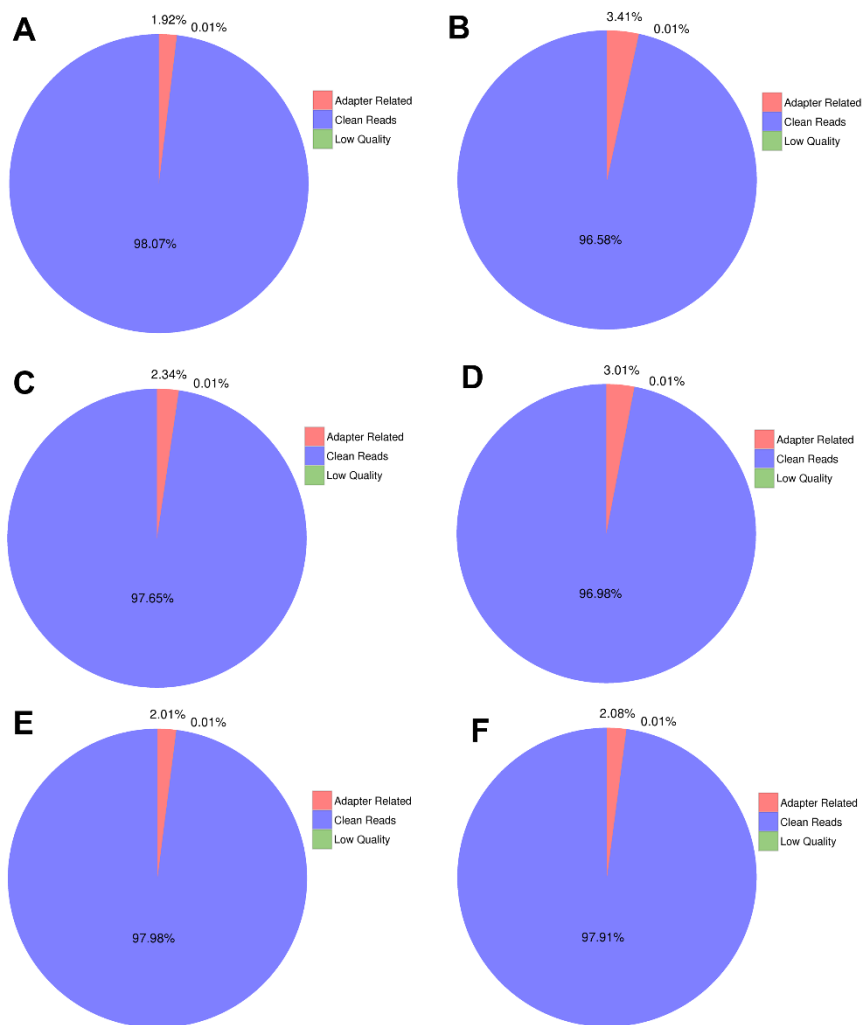

Supplement: 12864_2019_5503_MOESM1_ESM.pdf [file 12864_2019_5503_MOESM1_ESM.pdf]
