# Supplementary material for: Analyses of histological and transcriptome differences in the skin of short-hair and long-hair rabbits
Source: PubMed Central journal article supplement (PMC6377753; doi:10.1186/s12864-019-5503-x), 2019-02-15
Supplement: 12864_2019_5503_MOESM6_ESM.pdf [file 12864_2019_5503_MOESM6_ESM.pdf]

Table S1

| GO.ID      | Term                                                 | p Value | Number of DEGs |
|------------|------------------------------------------------------|---------|----------------|
| GO:0008544 | epidermis development                                | 0.00427 | 9              |
| GO:0030855 | epithelial cell differentiation                      | 0.00428 | 16             |
| GO:0042303 | molting cycle                                        | 0.01352 | 4              |
| GO:0042633 | hair cycle                                           | 0.01352 | 4              |
| GO:0008610 | lipid biosynthetic process                           | 0.01829 | 8              |
| GO:0006633 | fatty acid biosynthetic process                      | 0.02484 | 2              |
| GO:0001942 | hair follicle development                            | 0.02563 | 4              |
| GO:0022405 | hair cycle process                                   | 0.02563 | 4              |
| GO:0008543 | fibroblast growth factor receptor signalling pathway | 0.03275 | 3              |
| GO:0006629 | lipid metabolic process                              | 0.03689 | 19             |
| GO:0045017 | glycerolipid biosynthetic process                    | 0.03899 | 1              |
| GO:0044255 | cellular lipid metabolic process                     | 0.04482 | 9              |
