# Supplementary material for: Analyses of histological and transcriptome differences in the skin of short-hair and long-hair rabbits
Source: PubMed Central journal article supplement (PMC6377753; doi:10.1186/s12864-019-5503-x), 2019-02-15
Supplement: 12864_2019_5503_MOESM8_ESM.pdf [file 12864_2019_5503_MOESM8_ESM.pdf]

Table S2

| Samples | SNP Number | Genic SNP | Intergenic SNP | Transition | Transversion | Heterozygosity |
|---------|------------|-----------|----------------|------------|--------------|----------------|
| L1      | 258,338    | 205,438   | 52,900         | 75.13%     | 24.87%       | 34.98%         |
| L2      | 236,861    | 186,697   | 50,164         | 75.07%     | 24.93%       | 30.90%         |
| L3      | 231,653    | 182,480   | 49,173         | 74.92%     | 25.08%       | 33.82%         |
| S1      | 317,941    | 252,257   | 65,684         | 74.90%     | 25.10%       | 32.66%         |
| S2      | 268,516    | 216,072   | 52,444         | 75.38%     | 24.62%       | 34.75%         |
| S3      | 265,692    | 211,624   | 54,068         | 75.43%     | 24.57%       | 34.60%         |
