# Supplementary material for: Analyses of histological and transcriptome differences in the skin of short-hair and long-hair rabbits
Source: PubMed Central journal article supplement (PMC6377753; doi:10.1186/s12864-019-5503-x), 2019-02-15
Supplement: 12864_2019_5503_MOESM11_ESM.pdf [file 12864_2019_5503_MOESM11_ESM.pdf]

Table S3

| Primer               | Sequences of primers (5'→3') | TM (°C) | Size (bp) |
|----------------------|------------------------------|---------|-----------|
| KRT25-F <sup>1</sup> | GCAATTAACCTGAGACGCGAC        | 62      | 152       |
| KRT25-R <sup>2</sup> | GGGAGATCTGCGATTGATT          |         |           |
| KRT28-F              | CAAAGGGCTTCGGATTAGGA         | 62      | 124       |
| KRT28-R              | GCGTGAATCCGTGATGAAAG         |         |           |
| KRT39-F              | CGCGACAGGTGTGGAATTA          | 62      | 138       |
| KRT39-R              | TTGGCATGAGGTTGAAGAGG         |         |           |
| KRT40-F              | TCTCCTTTCAGCTCATTTTGGTA      | 62      | 152       |
| KRT40-R              | AACAACCTGCTTTGCCATCAGG       |         |           |
| KRT84-F              | GGGACCAGTTCAGCACCTTA         | 62      | 173       |
| KRT84-R              | CTCCGGGACCTGTGGATC           |         |           |
| FGF5-F               | GGCTTGGAGCAGAGCAGTT          | 62      | 99        |
| FGF5-R               | CGGGTAGATCTGCAGATGG          |         |           |
| GAPDH-F              | AGGTCCGAGTGAACGGATTT         | 62      | 93        |
| GAPDH-R              | GATCATTGATGGCGACAACA         |         |           |
